# Supplementary material
Source: PubMed Central journal article supplement (PMC555973)

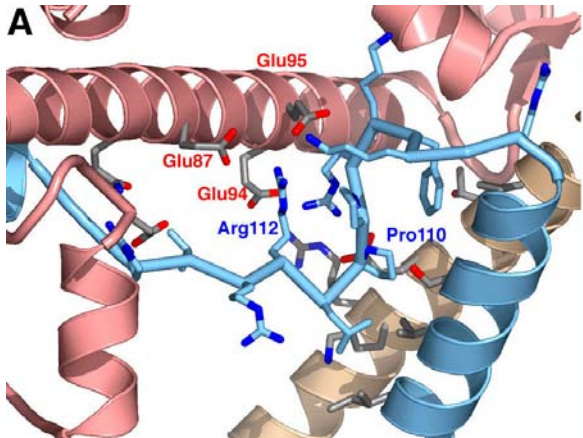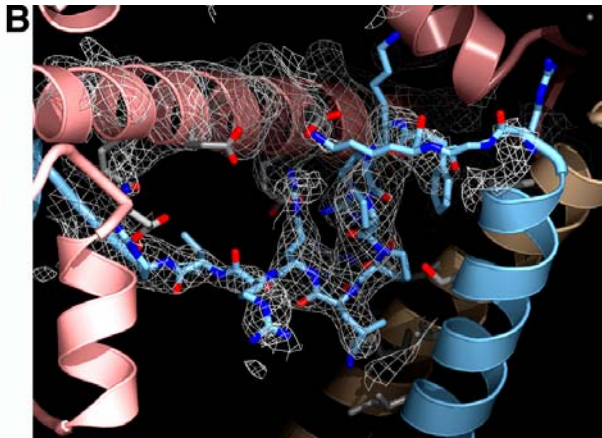

Supplement: pnas_102_14_5038__2.pdf [file pnas_102_14_5038__2.pdf]

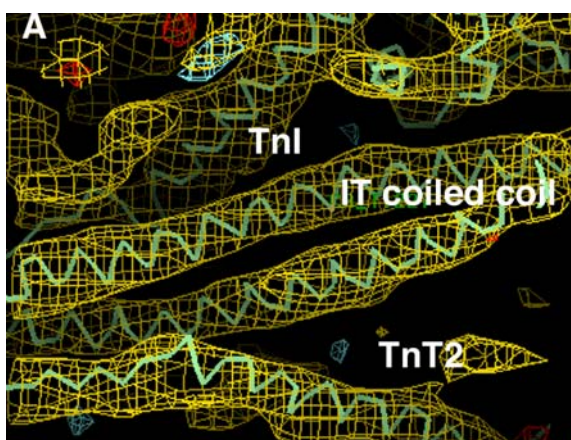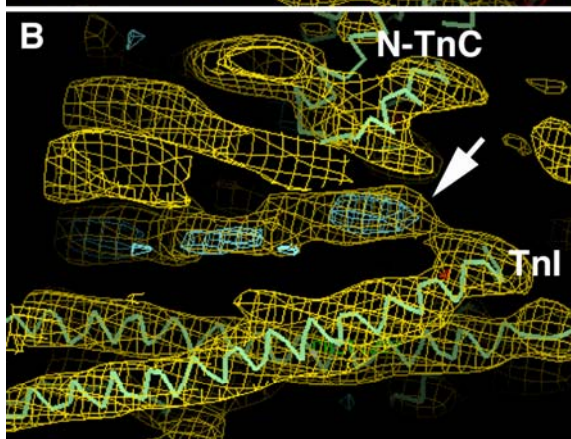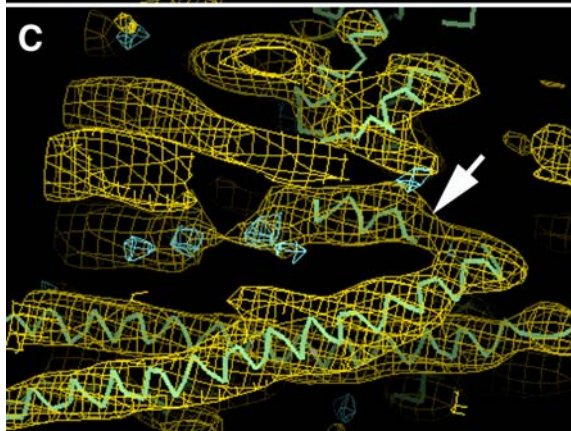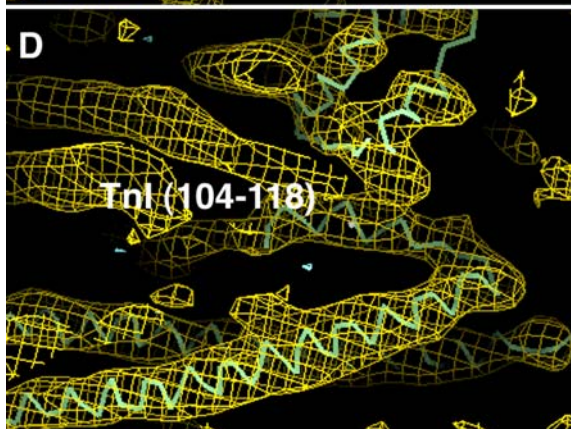

Supplement: pnas_102_14_5038__3.pdf [file pnas_102_14_5038__3.pdf]
